# Supplementary material for: Placenta autophagy is closely associated with preeclampsia
Source: Aging (Albany NY). 2022 Dec 19;15(24):15657–75. doi: 10.18632/aging.204436 (PMC10781466; doi:10.18632/aging.204436)
Supplement: Supplementary Figures [file aging-15-204436-s001.pdf]

SUPPLEMENTARY FIGURES

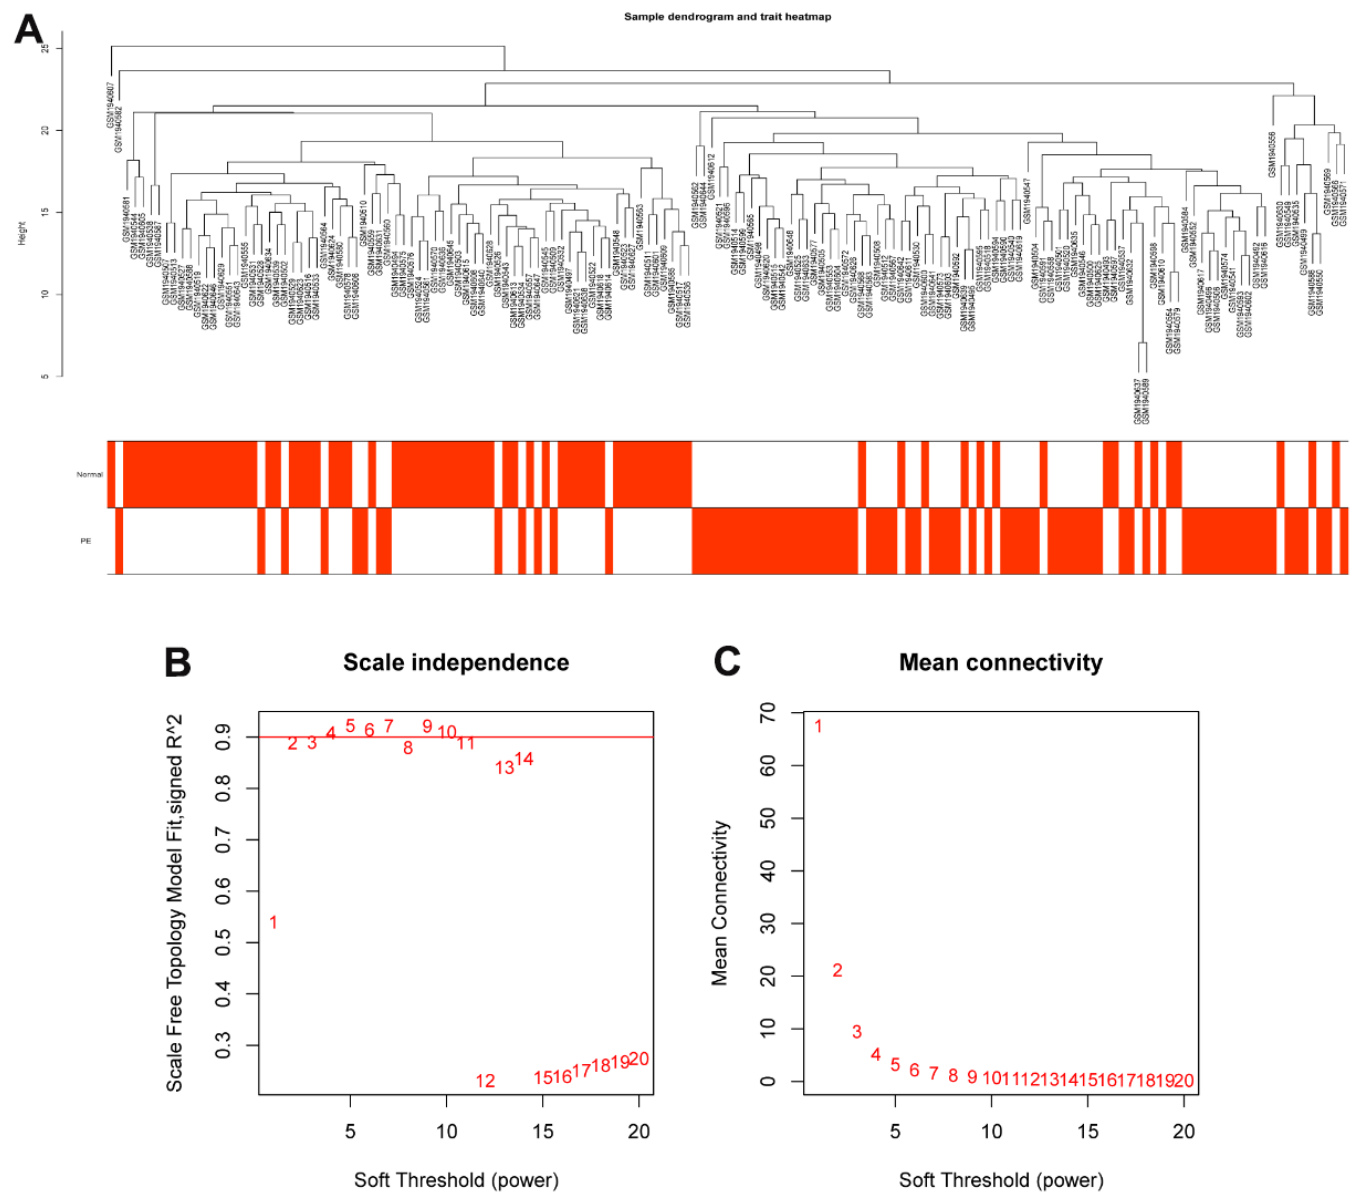

**Supplementary Figure 1. Construction of WGCNA network.** (A) Sample clustering of GSE75010. (B) Soft threshold determination. (C) Analysis of the mean connectivity for various soft-thresholding powers. WGCNA, weighted gene coexpression network analysis.

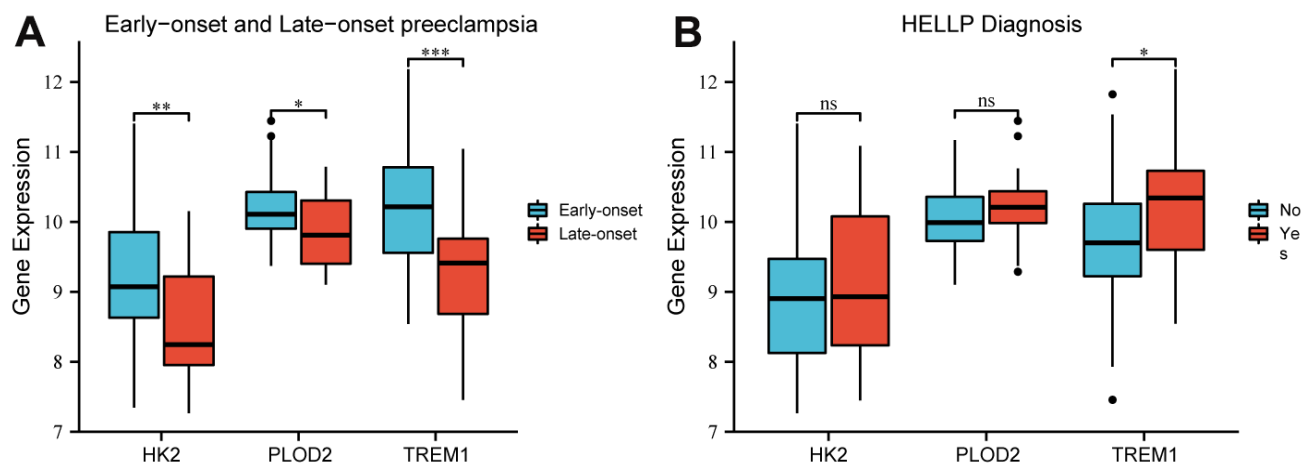

**Supplementary Figure 2.** Correlation analysis between the expression of the PE-related diagnostic biomarkers and clinical features, including preeclampsia staging (A) and HELLP syndrome (B). PE, preeclampsia. HELLP, hemolysis, elevated liver enzymes and low platelets.

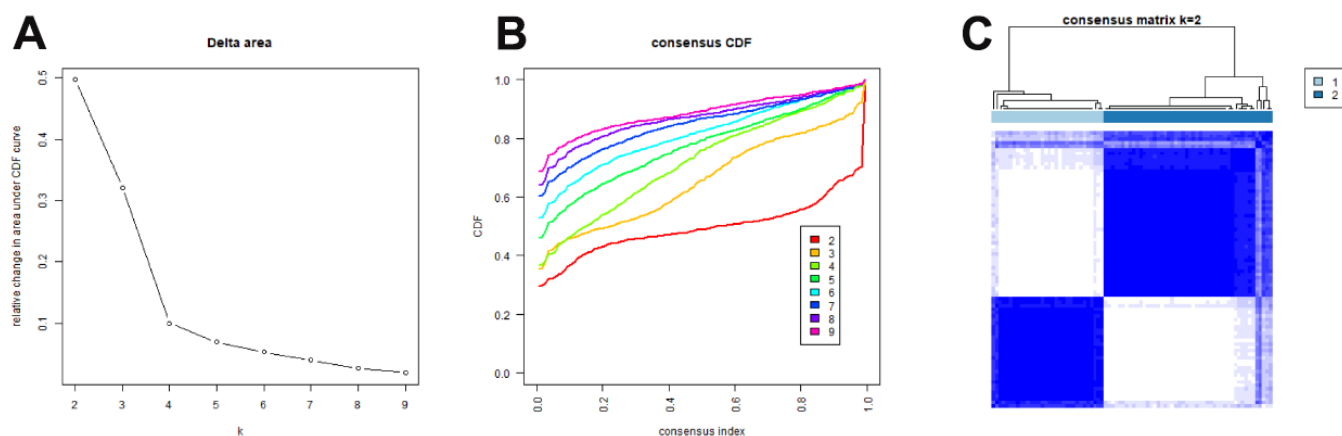

**Supplementary Figure 3. Unsupervised consensus clustering in the test cohort (GSE75010).** (A) Delta area curve of consensus clustering for  $k = 2$  to 9. (B) CDF for  $k = 2$  to 9. (C) Heatmap showing the two clusters of PE samples. CDF, cumulative distributive function. PE, preeclampsia.
