# Supplementary material for: Placenta autophagy is closely associated with preeclampsia
Source: Aging (Albany NY). 2022 Dec 19;15(24):15657–75. doi: 10.18632/aging.204436 (PMC10781466; doi:10.18632/aging.204436)
Supplement: Supplementary File 1 [file aging-15-204436-s003.xlsx]

## Sheet: Supplementary File 1
Supplementary File 1. Clinical features of GSE75010.
ID	Diagnosis	Tissue	Maternal Age	Maternal BMI	Maternal Ethnicity	Previous Nulliparity	Previous Miscarriage	Previous Hypertensive Pregnancy	Hellp Diagnosis	Intrauterine Growth Restriction(IUGR) Diagnosis	Mode of Delivery	Ga (week)	Ga (day)	Infant Gender	Apgar Score (1 min)	Apgar Score (5 min)	Chorioamnionitis Diagnosis
GSM1940492	PE	Placenta	39	NA	Caucasian	Yes	Yes	NA	No	No	C-Section	35	3	F	7	9	No
GSM1940493	non-PE	Placenta	34	21.11	Caucasian	No	No	Yes	No	No	C-Section	37	4	F	9	9	No
GSM1940494	non-PE	Placenta	35	31.25	Asian	Yes	Yes	NA	No	No	C-Section	36	1	F	9	9	No
GSM1940495	PE	Placenta	37	19.47	Caucasian	Yes	Yes	NA	No	No	Vaginal	37	2	M	6	7	No
GSM1940496	PE	Placenta	40	25.71	Caucasian	No	No	Yes	No	Yes	C-Section	29	6	F	7	9	No
GSM1940497	non-PE	Placenta	28	21.6	Caucasian	Yes	Yes	NA	No	No	Vaginal	40	4	M	8	9	No
GSM1940498	PE	Placenta	25	29.41	Other	Yes	No	NA	Yes	No	C-Section	31	2	M	6	9	No
GSM1940499	PE	Placenta	37	25	Caucasian	No	No	Yes	No	Yes	C-Section	35	4	F	9	9	No
GSM1940500	PE	Placenta	38	26.22	Black	No	Yes	Yes	No	Yes	Vaginal	31	5	F	9	9	No
GSM1940501	PE	Placenta	33	31.16	Asian	Yes	No	NA	No	No	C-Section	29	4	F	NA	NA	No
GSM1940502	PE	Placenta	26	31.2	Caucasian	Yes	No	NA	No	No	Vaginal	37	4	F	8	9	No
GSM1940503	non-PE	Placenta	34	23.88	Other	No	No	No	No	No	C-Section	38	4	M	9	9	No
GSM1940504	PE	Placenta	35	23.05	Caucasian	Yes	No	NA	No	No	C-Section	30	5	F	7	9	No
GSM1940505	PE	Placenta	31	18.65	Caucasian	Yes	No	NA	Yes	Yes	C-Section	30	5	M	8	9	No
GSM1940506	PE	Placenta	37	25.15	Other	Yes	Yes	NA	No	No	C-Section	34	4	F	NA	NA	No
GSM1940507	non-PE	Placenta	35	18.61	Asian	No	No	No	No	No	C-Section	30	3	F	5	9	No
GSM1940508	PE	Placenta	32	26.64	Black	No	Yes	Yes	Yes	No	C-Section	30	5	M	8	9	No
GSM1940509	PE	Placenta	30	29.34	Caucasian	No	Yes	Yes	No	No	C-Section	36	6	M	8	9	No
GSM1940510	PE	Placenta	21	21.91	Black	No	No	Yes	No	No	Vaginal	37	3	F	7	9	No
GSM1940511	non-PE	Placenta	17	NA	Other	Yes	No	NA	No	No	Vaginal	28	1	M	NA	NA	Yes
GSM1940512	PE	Placenta	36	29.02	Black	No	Yes	No	No	Yes	C-Section	33	1	M	8	9	No
GSM1940513	non-PE	Placenta	35	22.41	Black	No	No	No	No	No	C-Section	28	4	F	5	8	Yes
GSM1940514	PE	Placenta	35	34.29	Black	Yes	No	NA	No	Yes	C-Section	30	1	M	NA	NA	No
GSM1940515	PE	Placenta	43	29.76	Caucasian	Yes	No	NA	No	No	C-Section	31	2	M	NA	NA	No
GSM1940516	non-PE	Placenta	40	19.92	Caucasian	Yes	No	NA	No	No	C-Section	32	6	F	8	9	No
GSM1940517	non-PE	Placenta	34	31.37	Caucasian	No	No	No	No	No	C-Section	27	5	M	NA	NA	Yes
GSM1940518	PE	Placenta	31	25.82	Asian	Yes	No	NA	No	No	Vaginal	37	5	M	9	9	No
GSM1940519	non-PE	Placenta	38	33.96	Caucasian	No	No	No	No	No	C-Section	38	4	F	NA	NA	No
GSM1940520	PE	Placenta	39	33.96	Caucasian	Yes	No	NA	Yes	Yes	C-Section	32	4	F	NA	NA	No
GSM1940521	PE	Placenta	38	26.64	Black	No	No	No	No	No	C-Section	30	3	M	5	8	No
GSM1940522	non-PE	Placenta	25	26.7	Caucasian	No	Yes	NA	No	No	C-Section	38	5	M	9	9	No
GSM1940523	non-PE	Placenta	32	27.89	Black	No	Yes	Yes	No	Yes	C-Section	35	0	M	8	9	No
GSM1940524	non-PE	Placenta	32	21.16	Caucasian	No	Yes	No	No	No	C-Section	31	4	M	4	8	No
GSM1940525	PE	Placenta	43	26.56	Caucasian	Yes	Yes	NA	No	No	C-Section	39	2	M	9	9	No
GSM1940526	PE	Placenta	37	18.55	Caucasian	Yes	No	NA	No	No	C-Section	36	4	M	9	9	No
GSM1940527	non-PE	Placenta	32	23.94	Asian	No	No	Yes	No	No	Vaginal	39	0	F	9	9	Yes
GSM1940528	PE	Placenta	31	27.7	Caucasian	Yes	No	NA	No	No	C-Section	39	2	F	8	9	No
GSM1940529	non-PE	Placenta	35	18.26	Asian	Yes	No	NA	No	No	Vaginal	31	4	F	8	9	Yes
GSM1940530	PE	Placenta	30	24.39	Caucasian	Yes	No	NA	No	Yes	C-Section	30	0	M	8	9	No
GSM1940531	non-PE	Placenta	33	23.67	Caucasian	No	No	No	No	No	C-Section	38	4	F	NA	NA	No
GSM1940532	non-PE	Placenta	39	18.86	Asian	No	Yes	No	No	No	C-Section	38	6	M	9	9	No
GSM1940533	non-PE	Placenta	40	23.32	NA	No	Yes	NA	No	No	C-Section	38	3	F	9	9	No
GSM1940534	PE	Placenta	26	20.57	NA	Yes	No	NA	No	No	Vaginal	34	1	M	8	9	No
GSM1940535	PE	Placenta	40	NA	Asian	No	No	No	No	Yes	C-Section	34	5	F	8	9	No
GSM1940536	non-PE	Placenta	38	NA	Caucasian	No	No	No	No	No	Vaginal	27	4	M	NA	NA	No
GSM1940537	PE	Placenta	26	NA	Asian	Yes	No	NA	No	Yes	C-Section	32	0	F	8	9	No
GSM1940538	non-PE	Placenta	30	NA	Caucasian	No	No	NA	No	No	C-Section	26	4	M	8	9	Yes
GSM1940539	non-PE	Placenta	32	26.64	East Indian	No	Yes	No	No	No	C-Section	33	5	F	8	9	Yes
GSM1940540	PE	Placenta	32	55.36	Caucasian	Yes	No	NA	No	No	C-Section	33	3	M	9	9	No
GSM1940541	PE	Placenta	27	NA	Black	No	No	Yes	No	Yes	C-Section	27	5	F	4	8	No
GSM1940542	PE	Placenta	42	NA	Caucasian	Yes	No	NA	No	Yes	C-Section	29	3	M	4	8	No
GSM1940543	non-PE	Placenta	34	23.14	Caucasian	Yes	No	NA	No	Yes	C-Section	36	5	M	8	9	No
GSM1940544	non-PE	Placenta	40	21.63	Black	Yes	No	NA	No	No	C-Section	29	5	F	8	9	Yes
GSM1940545	non-PE	Placenta	34	19.47	Asian	Yes	No	NA	No	No	C-Section	38	4	M	8	9	No
GSM1940546	PE	Placenta	34	31.18	Caucasian	Yes	Yes	NA	No	Yes	C-Section	30	0	F	NA	NA	No
GSM1940547	PE	Placenta	35	19.72	Caucasian	No	No	NA	No	Yes	Vaginal	36	5	F	9	9	No
GSM1940548	non-PE	Placenta	31	31.91	Caucasian	Yes	No	NA	No	No	Vaginal	33	6	M	9	9	No
GSM1940549	PE	Placenta	37	21.16	Caucasian	No	No	Yes	No	No	C-Section	32	3	F	8	9	No
GSM1940550	PE	Placenta	41	32.88	East Indian	Yes	No	NA	No	Yes	C-Section	33	0	F	8	9	No
GSM1940551	non-PE	Placenta	35	34.48	Caucasian	No	No	No	No	No	C-Section	40	1	F	9	9	No
GSM1940552	PE	Placenta	34	34.77	Caucasian	Yes	Yes	NA	Yes	Yes	C-Section	27	0	F	3	8	No
GSM1940553	PE	Placenta	32	NA	Asian	No	Yes	NA	No	Yes	C-Section	30	2	M	8	9	No
GSM1940554	non-PE	Placenta	27	21.26	East Indian	Yes	No	NA	No	No	Vaginal	33	5	F	8	9	No
GSM1940555	non-PE	Placenta	34	NA	Caucasian	No	Yes	No	No	No	C-Section	37	4	F	9	9	No
GSM1940556	PE	Placenta	35	24.38	Black	No	No	Yes	No	Yes	C-Section	36	6	M	8	8	No
GSM1940557	non-PE	Placenta	39	27.28	Caucasian	No	No	NA	No	No	Vaginal	40	2	M	9	9	No
GSM1940558	PE	Placenta	32	33.2	Caucasian	Yes	No	NA	Yes	No	C-Section	28	3	F	6	9	No
GSM1940559	non-PE	Placenta	30	22.86	NA	No	Yes	NA	No	No	Vaginal	41	1	F	9	9	No
GSM1940560	PE	Placenta	30	24.38	Black	No	No	No	No	No	C-Section	37	2	F	8	9	No
GSM1940561	non-PE	Placenta	27	19.98	Caucasian	Yes	No	NA	No	No	Vaginal	32	6	M	9	9	No
GSM1940562	PE	Placenta	39	22.15	Caucasian	Yes	No	NA	Yes	No	C-Section	25	5	M	6	8	No
GSM1940563	non-PE	Placenta	27	18.26	Caucasian	No	No	No	No	No	C-Section	27	5	M	3	2	No
GSM1940564	PE	Placenta	37	26.12	NA	Yes	No	NA	Yes	No	Vaginal	35	3	F	3	6	No
GSM1940565	PE	Placenta	31	24.34	Caucasian	Yes	No	NA	Yes	No	C-Section	36	5	M	3	8	No
GSM1940566	non-PE	Placenta	31	23.05	Caucasian	Yes	No	NA	No	Yes	C-Section	36	5	F	NA	NA	No
GSM1940567	PE	Placenta	NA	23.51	Asian	No	No	No	No	No	Vaginal	36	2	M	9	9	No
GSM1940568	non-PE	Placenta	40	NA	Black	No	Yes	NA	No	No	C-Section	26	0	F	1	5	No
GSM1940569	PE	Placenta	34	21.16	Caucasian	No	No	No	No	No	Vaginal	37	3	M	9	9	No
GSM1940570	non-PE	Placenta	32	29.75	Caucasian	No	No	No	No	No	Vaginal	32	6	M	9	9	No
GSM1940571	PE	Placenta	43	36.63	Caucasian	No	No	Yes	No	No	Vaginal	33	5	F	7	9	No
GSM1940572	PE	Placenta	34	23.83	Black	Yes	No	NA	Yes	No	C-Section	31	6	M	9	10	No
GSM1940573	PE	Placenta	28	20.28	Caucasian	Yes	No	NA	Yes	No	C-Section	37	6	M	9	9	No
GSM1940574	PE	Placenta	22	23.44	Black	Yes	No	NA	No	No	C-Section	30	0	F	6	8	No
GSM1940575	non-PE	Placenta	41	28.3	Asian	No	No	Yes	No	No	C-Section	37	0	F	9	9	No
GSM1940576	non-PE	Placenta	33	21.1	Caucasian	Yes	No	NA	No	No	C-Section	32	4	M	8	9	No
GSM1940577	PE	Placenta	25	28.44	Black	Yes	No	NA	Yes	No	C-Section	28	3	M	7	9	No
GSM1940578	non-PE	Placenta	40	21.16	Caucasian	Yes	No	NA	No	No	C-Section	38	5	F	9	9	No
GSM1940579	non-PE	Placenta	33	22.23	Other	No	Yes	Yes	No	No	C-Section	31	4	F	9	9	No
GSM1940580	non-PE	Placenta	40	23.94	Asian	Yes	No	NA	No	No	Vaginal	37	1	F	7	8	No
GSM1940581	non-PE	Placenta	NA	19.88	Caucasian	No	No	NA	No	No	Vaginal	31	0	F	NA	NA	Yes
GSM1940582	PE	Placenta	39	25.45	Caucasian	Yes	No	NA	No	Yes	C-Section	36	0	M	8	9	No
GSM1940583	PE	Placenta	29	28.72	Black	No	No	Yes	No	Yes	C-Section	32	5	M	8	9	No
GSM1940584	PE	Placenta	34	25.39	Caucasian	No	Yes	No	No	Yes	C-Section	27	5	F	4	8	No
GSM1940585	non-PE	Placenta	28	29.75	Caucasian	Yes	No	NA	No	No	Vaginal	26	1	M	6	8	Yes
GSM1940586	non-PE	Placenta	42	NA	Asian	Yes	Yes	NA	No	Yes	C-Section	27	3	F	NA	NA	No
GSM1940587	non-PE	Placenta	26	25	Caucasian	Yes	No	NA	No	No	Vaginal	27	4	M	7	9	Yes
GSM1940588	non-PE	Placenta	36	26.3	Other	No	No	NA	No	No	C-Section	26	2	M	4	8	Yes
GSM1940589	PE	Placenta	41	23.17	Caucasian	Yes	Yes	NA	Yes	No	C-Section	26	6	F	8	9	No
GSM1940590	PE	Placenta	20	NA	Caucasian	Yes	No	NA	No	Yes	C-Section	32	1	M	8	9	No
GSM1940591	non-PE	Placenta	34	24.57	Caucasian	No	Yes	NA	No	Yes	C-Section	27	5	M	3	6	No
GSM1940592	PE	Placenta	36	26.56	Caucasian	Yes	No	NA	No	Yes	C-Section	34	1	M	5	6	No
GSM1940593	PE	Placenta	41	24.61	East Indian	Yes	No	NA	Yes	No	C-Section	28	4	F	8	9	No
GSM1940594	non-PE	Placenta	34	NA	Caucasian	Yes	No	NA	No	Yes	C-Section	32	3	M	4	8	No
GSM1940595	non-PE	Placenta	42	21.72	East Indian	Yes	No	NA	No	Yes	C-Section	37	1	M	9	9	No
GSM1940596	PE	Placenta	24	25	Caucasian	Yes	Yes	NA	No	No	C-Section	31	0	F	7	9	No
GSM1940597	non-PE	Placenta	37	26.9	Asian	No	Yes	NA	No	Yes	C-Section	31	4	F	8	9	No
GSM1940598	non-PE	Placenta	37	29.04	Caucasian	Yes	No	NA	No	Yes	C-Section	29	3	F	9	9	No
GSM1940599	PE	Placenta	39	27.34	Black	No	No	NA	Yes	No	C-Section	27	5	M	9	9	No
GSM1940600	non-PE	Placenta	44	19.53	Asian	Yes	No	NA	No	Yes	C-Section	34	6	M	9	9	No
GSM1940601	non-PE	Placenta	33	22.66	Caucasian	Yes	Yes	NA	No	No	Vaginal	29	2	M	8	9	Yes
GSM1940602	PE	Placenta	24	29.62	Asian	Yes	No	NA	No	No	C-Section	29	6	F	NA	NA	No
GSM1940603	PE	Placenta	37	26.4	Caucasian	Yes	No	NA	No	No	C-Section	36	0	M	5	9	No
GSM1940604	PE	Placenta	32	NA	Asian	Yes	No	NA	Yes	Yes	C-Section	29	3	M	NA	NA	No
GSM1940605	non-PE	Placenta	24	39.25	Caucasian	Yes	No	NA	No	No	Vaginal	25	6	F	7	9	Yes
GSM1940606	PE	Placenta	31	26.37	East Indian	No	No	Yes	No	No	C-Section	37	3	F	9	9	No
GSM1940607	non-PE	Placenta	21	25.54	Caucasian	Yes	Yes	NA	No	No	C-Section	32	0	M	8	9	No
GSM1940608	non-PE	Placenta	36	32.05	Caucasian	No	No	No	No	No	C-Section	38	3	M	9	9	No
GSM1940609	non-PE	Placenta	30	23.73	Caucasian	Yes	No	NA	No	No	Vaginal	27	1	M	NA	NA	Yes
GSM1940610	PE	Placenta	34	19.03	Caucasian	No	No	Yes	No	No	Vaginal	37	0	F	9	9	No
GSM1940611	PE	Placenta	36	25.24	Asian	No	Yes	No	No	No	C-Section	31	6	M	NA	NA	No
GSM1940612	PE	Placenta	31	19.56	Caucasian	Yes	No	NA	Yes	No	C-Section	30	2	F	7	9	No
GSM1940613	non-PE	Placenta	36	23.24	Caucasian	No	No	No	No	No	C-Section	38	6	M	9	9	No
GSM1940614	PE	Placenta	26	23.67	Caucasian	No	No	Yes	No	No	Vaginal	37	3	M	9	9	No
GSM1940615	non-PE	Placenta	31	21.34	East Indian	Yes	Yes	NA	No	No	Vaginal	40	4	M	9	9	No
GSM1940616	PE	Placenta	25	27.34	Caucasian	No	No	No	Yes	No	C-Section	30	5	F	5	8	No
GSM1940617	PE	Placenta	32	NA	East Indian	Yes	No	NA	Yes	No	C-Section	33	2	F	5	9	No
GSM1940618	non-PE	Placenta	31	30.47	Asian	Yes	No	NA	No	No	C-Section	39	3	M	8	9	No
GSM1940619	PE	Placenta	43	34.42	Caucasian	No	No	Yes	No	No	C-Section	36	0	M	8	9	No
GSM1940620	PE	Placenta	19	23.14	Caucasian	Yes	No	NA	Yes	No	C-Section	26	6	M	NA	NA	No
GSM1940621	non-PE	Placenta	28	32.91	Asian	Yes	No	NA	No	No	Vaginal	40	2	M	9	9	No
GSM1940622	non-PE	Placenta	29	34.89	Caucasian	No	No	No	No	No	Vaginal	40	5	F	9	9	No
GSM1940623	non-PE	Placenta	37	26.45	Asian	No	Yes	No	No	No	C-Section	38	2	F	9	9	No
GSM1940624	non-PE	Placenta	38	31.6	Black	No	Yes	No	No	Yes	C-Section	29	0	F	NA	NA	No
GSM1940625	PE	Placenta	29	24.98	Black	Yes	No	NA	No	Yes	C-Section	32	4	F	9	9	No
GSM1940626	PE	Placenta	40	NA	Black	No	Yes	NA	No	No	C-Section	27	4	M	8	9	No
GSM1940627	non-PE	Placenta	31	17.15	Asian	No	No	No	No	No	C-Section	39	3	M	9	9	No
GSM1940628	non-PE	Placenta	29	17.97	Black	No	No	No	No	Yes	C-Section	36	6	M	9	9	No
GSM1940629	non-PE	Placenta	34	20.58	Caucasian	No	No	No	No	No	Vaginal	38	6	F	9	9	No
GSM1940630	non-PE	Placenta	31	25.39	Black	No	Yes	No	No	Yes	C-Section	30	4	F	5	9	No
GSM1940631	PE	Placenta	37	19.83	East Indian	No	No	No	No	No	Vaginal	34	6	F	9	9	No
GSM1940632	PE	Placenta	31	33.96	Black	Yes	No	NA	Yes	No	C-Section	30	1	F	9	9	No
GSM1940633	PE	Placenta	30	29.83	Caucasian	Yes	No	NA	Yes	No	C-Section	28	3	M	8	9	No
GSM1940634	non-PE	Placenta	32	19.88	Asian	Yes	No	NA	No	No	Vaginal	35	6	F	9	9	No
GSM1940635	PE	Placenta	31	NA	Asian	No	Yes	Yes	No	Yes	C-Section	31	6	F	8	9	No
GSM1940636	non-PE	Placenta	18	24.77	Caucasian	Yes	No	NA	No	No	Vaginal	34	1	M	9	9	No
GSM1940637	non-PE	Placenta	33	19.88	Caucasian	No	No	No	No	No	C-Section	38	5	F	9	9	No
GSM1940638	non-PE	Placenta	43	21.45	Caucasian	No	Yes	No	No	No	Vaginal	39	3	M	9	9	No
GSM1940639	non-PE	Placenta	30	21.51	Asian	Yes	No	NA	No	No	Vaginal	37	0	M	9	9	No
GSM1940640	non-PE	Placenta	29	20.31	Caucasian	Yes	No	NA	No	No	C-Section	38	0	M	9	9	No
GSM1940641	PE	Placenta	38	21.64	Asian	Yes	No	NA	No	No	Vaginal	36	2	M	5	9	No
GSM1940642	non-PE	Placenta	36	21.09	Asian	Yes	No	NA	No	Yes	C-Section	31	4	M	9	9	No
GSM1940643	non-PE	Placenta	28	21.91	Caucasian	Yes	No	NA	No	No	C-Section	39	5	F	8	9	No
GSM1940644	PE	Placenta	26	31.49	Caucasian	No	No	No	No	No	C-Section	30	4	F	3	6	No
GSM1940645	non-PE	Placenta	35	29.14	Caucasian	No	No	Yes	No	No	C-Section	39	3	M	9	9	No
GSM1940646	non-PE	Placenta	33	22.31	Caucasian	No	Yes	No	No	No	Vaginal	39	0	M	9	9	No
GSM1940647	PE	Placenta	28	22.95	Caucasian	Yes	No	NA	No	No	Vaginal	38	4	M	9	9	Yes
GSM1940648	PE	Placenta	39	25.35	Caucasian	Yes	No	NA	No	No	C-Section	30	0	M	8	9	No
