# Supplementary material for: Placenta autophagy is closely associated with preeclampsia
Source: Aging (Albany NY). 2022 Dec 19;15(24):15657–75. doi: 10.18632/aging.204436 (PMC10781466; doi:10.18632/aging.204436)
Supplement: Supplementary File 2 [file aging-15-204436-s004.xlsx]

## Sheet: Supplementary File 2
Supplementary File 2. Autophagy-related gene.
AMBRA1
APOL1
ARNT
ARSA
ARSB
ATF4
ATF6
ATG10
ATG12
ATG16L1
ATG16L2
ATG2A
ATG2B
ATG3
ATG4A
ATG4B
ATG4C
ATG4D
ATG5
ATG7
ATG9A
ATG9B
ATIC
BAG1
BAG3
BAK1
BAX
BCL2
BCL2L1
BECN1
BID
BIRC5
BIRC6
BNIP1
BNIP3
BNIP3L
C12orf44
C17orf88
CALCOCO2
CAMKK2
CANX
CAPN1
CAPN10
CAPN2
CAPNS1
CASP1
CASP3
CASP4
CASP8
CCL2
CCR2
CD46
CDKN1A
CDKN1B
CDKN2A
CFLAR
CHMP2B
CHMP4B
CLN3
CTSB
CTSD
CTSL1
CX3CL1
CXCR4
DAPK1
DAPK2
DDIT3
DIRAS3
DLC1
DNAJB1
DNAJB9
DRAM1
EDEM1
EEF2
EEF2K
EGFR
EIF2AK2
EIF2AK3
EIF2S1
EIF4EBP1
EIF4G1
ERBB2
ERN1
ERO1L
FADD
FAM48A
FAS
FKBP1A
FKBP1B
FOS
FOXO1
FOXO3
GAA
GABARAP
GABARAPL1
GABARAPL2
GAPDH
GNAI3
GNB2L1
GOPC
GRID1
GRID2
HDAC1
HDAC6
HGS
HIF1A
HSP90AB1
HSPA5
HSPA8
HSPB8
IFNG
IKBKB
IKBKE
IL24
IRGM
ITGA3
ITGA6
ITGB1
ITGB4
ITPR1
KIAA0226
KIAA0652
KIAA0831
KIF5B
KLHL24
LAMP1
LAMP2
MAP1LC3A
MAP1LC3B
MAP1LC3C
MAP2K7
MAPK1
MAPK3
MAPK8
MAPK8IP1
MAPK9
MBTPS2
MLST8
MTMR14
MTOR
MYC
NAF1
NAMPT
NBR1
NCKAP1
NFE2L2
NFKB1
NKX2-3
NLRC4
NPC1
NRG1
NRG2
NRG3
P4HB
PARK2
PARP1
PEA15
PELP1
PEX14
PEX3
PIK3C3
PIK3R4
PINK1
PPP1R15A
PRKAB1
PRKAR1A
PRKCD
PRKCQ
PTEN
PTK6
RAB11A
RAB1A
RAB24
RAB33B
RAB5A
RAB7A
RAC1
RAF1
RB1
RB1CC1
RELA
RGS19
RHEB
RPS6KB1
RPTOR
SAR1A
SERPINA1
SESN2
SH3GLB1
SIRT1
SIRT2
SPHK1
SPNS1
SQSTM1
ST13
STK11
TBK1
TM9SF1
TMEM49
TMEM74
TNFSF10
TP53
TP53INP2
TP63
TP73
TSC1
TSC2
TUSC1
ULK1
ULK2
ULK3
USP10
UVRAG
VAMP3
VAMP7
VEGFA
WDFY3
WDR45
WDR45L
WIPI1
WIPI2
ZFYVE1
ABL1
ACBD5
ACIN1
ACTRT1
ADAMTS7
AKR1E2
ALKBH5
ALPK1
ANXA5
ANXA7
ASB2
ATG13
ATG14
ATP13A2
ATP1B1
ATPAF1-AS1
ATPIF1
BECN1P1
BLOC1S1
BMP2KL
BOC
C11orf2
C11orf41
C12orf5
C14orf133
C1orf210
C5
C6orf106
C7orf59
C7orf68
C8orf59
C9orf72
CA7
CALCB
CAPS
CCDC36
CD163L1
CD93
CDC37
CHAF1B
CHMP2A
CHMP3
CHMP4A
CHMP4C
CHMP6
CHST3
CISD2
CLDN7
CLEC16A
CLVS1
COX8A
CPA3
CRNKL1
CSPG5
CTSA
CXCR7
DAP
DKKL1
DNAAF2
DPF3
DRAM2
DYNLL1
DYNLL2
DZANK1
EI24
EPG5
EPM2A
FABP1
FAM125A
FAM131B
FAM134B
FAM13B
FAM176A
FAM176B
FANCC
FANCF
FANCL
FBXO7
FCGR3B
FGF14
FGF7
FGFBP1
FIS1
FNBP1L
FUNDC1
FUNDC2
FXR2
GABARAPL3
GABRA5
GDF5
GMIP
HAP1
HAPLN1
HBXIP
HCAR1
HIST1H3A
HIST1H3B
HIST1H3C
HIST1H3D
HIST1H3E
HIST1H3F
HIST1H3G
HIST1H3H
HIST1H3I
HIST1H3J
HK2
HMGB1
HPR
HSF2BP
HSP90AA1
IFI16
IPPK
IST1
ITPKC
KCNK3
KCNQ1
KIAA1324
KRCC1
KRT15
KRT73
LAMTOR1
LAMTOR2
LAMTOR3
LARP1B
LENG9
LGALS8
LIX1
LIX1L
LMCD1
LRRK2
LRSAM1
LSM4
MAP1A
MAP1LC3B2
MAP1S
MAP2K1
MAP3K12
MARK2
MBD5
MDH1
MEX3C
MFN1
MFN2
MRPS10
MRPS2
MSTN
MTERFD1
MTMR3
MTSS1
MYH11
MYLK
MYOM1
NDUFB9
NEFM
NHLRC1
NME2
NR2C2
NRBF2
NTHL1
NUP93
OBSCN
OPTN
P2RX5
PACS2
PARK7
PDK1
PDK4
PEX13
PFKP
PGK2
PHF23
PHYHIP
PI4K2A
PIK3CA
PIK3CB
PLEKHM1
PLOD2
PNPO
PPARGC1A
PPY
PRKAA1
PRKAA2
PRKAB2
PRKAG1
PRKAG2
PRKAG3
PRKD2
PRKG1
PSEN1
PTPN22
RAB12
RAB1B
RAB23
RAB39
RBM18
REEP2
REP15
RFWD3
RIMS3
RNF185
RNF41
RPS27A
RRAGA
RRAGB
RRAGC
RRAGD
S100A8
S100A9
SCN1A
SERPINB10
SFRP4
SLC1A3
SLC1A4
SLC22A3
SLC25A19
SLC35B3
SLC35C1
SLC37A4
SLC6A1
SLCO1A2
SMURF1
SNAP29
SNAPIN
SNF8
SNRPB
SNRPB2
SNRPD1
SNRPF
SNTG1
SNX14
SPATA18
SRPX
STAM
STAM2
STAT2
STBD1
STK32A
STOM
STX12
STX17
SUPT3H
TBC1D17
TBC1D25
TBC1D5
TCIRG1
TEAD4
TECPR1
TECPR2
TFEB
TMBIM6
TMEM203
TMEM208
TMEM39A
TMEM39B
TMEM59
TMEM93
TNIK
TOLLIP
TOMM20
TOMM22
TOMM40
TOMM5
TOMM6
TOMM7
TOMM70A
TP53INP1
TRAPPC8
TREM1
TRIM17
TRIM5
TSG101
TXLNA
UBA52
UBB
UBC
UBQLN1
UBQLN2
UBQLN4
USP13
USP30
VAMP8
VDAC1
VMP1
VPS11
VPS16
VPS18
VPS25
VPS28
VPS33A
VPS33B
VPS36
VPS37A
VPS37B
VPS37C
VPS37D
VPS39
VPS41
VPS4A
VPS4B
VTA1
VTI1A
VTI1B
XBP1
YIPF1
ZCCHC17
ZKSCAN3
ZNF189
ZNF593
ZNF681
