# Supplementary material for: Placenta autophagy is closely associated with preeclampsia
Source: Aging (Albany NY). 2022 Dec 19;15(24):15657–75. doi: 10.18632/aging.204436 (PMC10781466; doi:10.18632/aging.204436)
Supplement: Supplementary File 3 [file aging-15-204436-s005.xlsx]

## Sheet: Supplementary File 3
Supplementary File 3. 281 genes within turquoise module.
ABCA12
ABCA6
ABCA8
ABCB1
ABCG2
ACOXL
ACTA2
ACTG2
ADAMTS3
AFAP1
AGPAT5
AHSP
ALAS2
ANGPT2
ANKRD37
AOC1
AOX1
APOL4
AQP11
AQP3
AQPEP
ARHGEF28
ASB2
ATP2C2
B3GNT3
BBOX1
BCL6
BHLHE40
BIN2
C12orf75
C14orf37
C15orf48
C4orf26
C7
CA1
CADM3
CARD17
CASQ1
CATSPERB
CBR1
CCL2
CD97
CDH6
CDK1
CEMIP
CGB
CGB5
CLC
CLDN1
CLDN10
CLDN16
CLDN8
CLEC4M
CNGA1
COL17A1
COLEC10
CORO2A
CP
CPS1
CPXM2
CRCT1
CRH
CRHBP
CRISPLD1
CX3CR1
CXCL1
CXCL14
CYP1B1
CYP24A1
CYR61
CYSLTR1
DEFA1B
DHRS2
DIO2
DNAH11
DPYD
ENG
ENPEP
ERAP2
ERVK3-2
FABP4
FAM26D
FGF7
FKBP5
FLJ13744
FLJ38894
FLNB
FLT1
FOS
FRZB
FSTL3
GABRA4
GABRB1
GALNT11
GALNT15
GBAP1
GNGT1
GPR128
GPR146
GPR155
GPR32P1
GPR34
GREM2
GSTA3
GSTM1
GSTM3
GTSF1
GUCA2A
GYPA
HAPLN1
HCAR2
HCAR3
HILPDA
HIST1H2BM
HK2
HMGCS2
HMHA1
HORMAD1
HPGDS
HPSE
HSPA1A
HSPA4L
HTRA1
HTRA4
IFI44L
IFIT1B
IGKV2D-26
IL13RA2
IL1RL1
IL22RA2
IL33
IL3RA
INHA
INHBA
KIAA1456
KIT
KRTAP26-1
LEP
LEPREL1
LGSN
LIMD1
LIN7A
LINC00221
LINC00266-1
LINC00474
LINC00652
LOC100129345
LPHN3
LPL
LRRC39
LRRN1
LRRN3
LTF
LYPD5
MAGEA4
METTL21C
MID1
MIR145
MIR520C
MMP1
MMRN1
MUC1
MUC20
MUCL1
MUM1L1
MXRA5
NAALADL2
NDRG1
NEK11
NLRP10
NLRP2
NPFFR2
NPNT
NRIP1
NTRK2
NUDT12
OLFML3
OPRK1
OR4F29
OR51B5
OR52N5
OR9A2
OTOGL
OXGR1
P4HA1
PART1
PDGFD
PLA2G2A
PLA2G4A
PLAT
PLOD2
POF1B
PPBP
PROK1
PSCA
PTGS2
PTX3
PVRL4
QPCT
RARRES1
RASEF
RASGRP1
RFX6
RGS5
RNA5SP109
RNASE11
RNU1-59P
RNU6-1003P
RNU6-1024P
RNU6-124P
RNU6-162P
RNU6-316P
RNU6-466P
RNU6-729P
RNU6-732P
RNU6-943P
RNY3P2
RPS6KA6
RPS9
S100A12
S100A8
SASH1
SBSPON
SCD
SERPINA3
SERPINB10
SERPINI1
SFXN3
SH3BP5
SH3PXD2A
SIGLEC6
SLC26A7
SLC27A2
SLC2A3
SLC34A2
SLC6A10PB
SLC6A15
SLCO2A1
SLCO4A1
SNORD114-6
SNORD116-21
SPON1
SPX
ST8SIA6
STAT4
STBD1
STC1
SV2B
SYNPR
TCL6
TET3
THBS1
TMC4
TMEM136
TMEM45A
TMPRSS11F
TPTE
TPTE2
TPTE2P3
TREM1
TREML2
TRGV9
TVP23A
TXLNGY
UCA1
UPK1B
VCAM1
VEGFA
VNN1
VNN2
VNN3
VSNL1
VTRNA1-2
WNT2
XCL1
XDH
ZC2HC1A
ZNF114
ZNF208
ZNF300P1
ZNF667-AS1
