# Supplementary material for: Placenta autophagy is closely associated with preeclampsia
Source: Aging (Albany NY). 2022 Dec 19;15(24):15657–75. doi: 10.18632/aging.204436 (PMC10781466; doi:10.18632/aging.204436)
Supplement: Supplementary File 4 [file aging-15-204436-s006.xlsx]

## Sheet: Supplementary File 4
Supplementary File 4. 103 DEGs of GSE75010 dataset.
id	logFC	AveExpr	t	P.Value	adj.P.Val	B
FLT1	0.878449	12.0098	11.2877	4.29e-22	9.98e-18	39.41
FSTL3	1.35148	11.226	11.0171	2.37e-21	2.76e-17	37.7538
FLNB	0.707527	10.2437	10.8758	5.78e-21	4.48e-17	36.8912
COL17A1	0.966245	8.69195	10.2314	3.28e-19	1.91e-15	32.9763
NDRG1	0.717311	11.0381	10.0797	8.44e-19	3.87e-15	32.0613
SH3PXD2A	0.681504	9.33111	10.053	9.97e-19	3.87e-15	31.9001
SASH1	0.961485	9.93882	9.93462	2.08e-18	6.67e-15	31.1879
SPAG4	0.592138	7.37364	9.91899	2.29e-18	6.67e-15	31.094
HTRA4	1.2592	11.3877	9.81666	4.32e-18	1.12e-14	30.4801
P4HA1	0.616869	9.42648	9.61631	1.49e-17	3.14e-14	29.2823
TPBG	0.521892	9.33963	9.53265	2.48e-17	3.99e-14	28.784
SH3BP5	0.838121	9.32205	9.52117	2.67e-17	3.99e-14	28.7157
LEP	2.12038	10.1628	9.51662	2.74e-17	3.99e-14	28.6886
DIO2	1.05129	7.14627	9.38621	6.09e-17	7.92e-14	27.9144
PPP1R1C	0.526948	6.78414	9.35295	7.47e-17	9.15e-14	27.7174
PROCR	0.570892	10.3903	9.14346	2.67e-16	2.59e-13	26.481
HMHA1	0.641947	8.77768	9.12709	2.95e-16	2.64e-13	26.3847
SFXN3	0.584178	9.2055	9.07651	4.01e-16	3.46e-13	26.0876
C12orf75	0.680369	9.38367	9.03125	5.28e-16	4.39e-13	25.8221
BHLHE40	0.887302	9.68641	8.84158	1.66e-15	1.29e-12	24.7142
ERO1L	0.569804	10.2593	8.763	2.65e-15	1.87e-12	24.2574
TET3	0.573065	8.38321	8.75696	2.75e-15	1.88e-12	24.2223
FAM26D	-0.881046	7.18023	-8.72934	3.25e-15	2.1e-12	24.0621
PRKD3	0.507427	7.07235	8.72247	3.38e-15	2.13e-12	24.0223
TMEM45A	1.11233	8.42394	8.71307	3.58e-15	2.19e-12	23.9679
MTSS1L	0.514122	8.90123	8.57845	7.99e-15	4.53e-12	23.19
SIGLEC6	0.72051	11.5115	8.52933	1.07e-14	5.79e-12	22.9073
SLC6A10PB	0.663323	9.7407	8.517	1.15e-14	5.96e-12	22.8364
NPNT	0.809374	8.60539	8.47598	1.47e-14	7.43e-12	22.6009
RASEF	0.729922	7.9927	8.45152	1.7e-14	8.4e-12	22.4606
LIMD1	0.624564	9.33484	8.41761	2.07e-14	9.66e-12	22.2664
INHA	0.821537	8.94641	8.41752	2.07e-14	9.66e-12	22.2659
INHBA	0.66839	12.2657	8.41161	2.15e-14	9.8e-12	22.2321
ENG	0.59299	11.4366	8.38591	2.5e-14	1.1e-11	22.0851
PVRL4	0.656791	10.3284	8.31923	3.7e-14	1.43e-11	21.7046
BCL6	0.710636	9.30928	8.31385	3.82e-14	1.43e-11	21.674
QPCT	0.79273	7.17992	8.21552	6.81e-14	2.4e-11	21.1151
NEK11	0.711362	7.40787	8.21156	6.97e-14	2.42e-11	21.0927
GBAP1	0.563852	7.82677	8.0704	1.59e-13	4.9e-11	20.2952
CORO2A	0.638611	7.21705	8.05858	1.7e-13	5.08e-11	20.2287
FLJ13744	-0.686529	8.33372	-8.0463	1.83e-13	5.38e-11	20.1596
HK2	1.09786	8.45466	8.04076	1.89e-13	5.49e-11	20.1284
AFAP1	0.563211	8.2964	8.033	1.97e-13	5.67e-11	20.0849
GPR146	0.598444	8.29783	7.9503	3.19e-13	8.73e-11	19.6211
RDH13	0.502122	9.6417	7.93988	3.38e-13	9.05e-11	19.5629
ZC2HC1A	-0.568655	8.99524	-7.88229	4.72e-13	1.22e-10	19.2413
SLCO2A1	0.628486	11.1966	7.85282	5.59e-13	1.4e-10	19.0771
SYDE1	0.504613	10.0176	7.81221	7.06e-13	1.75e-10	18.8513
HILPDA	0.726596	9.7567	7.80813	7.23e-13	1.77e-10	18.8287
PART1	-0.729958	6.84797	-7.79653	7.72e-13	1.87e-10	18.7643
NTRK2	0.602955	6.60116	7.77724	8.63e-13	2.03e-10	18.6573
SERPINA3	1.62342	7.90433	7.71796	1.21e-12	2.68e-10	18.3293
TMEM136	-0.568924	7.7544	-7.71676	1.22e-12	2.68e-10	18.3227
ACOXL	-0.658898	7.68947	-7.656	1.72e-12	3.62e-10	17.9877
NOG	0.585214	7.75594	7.65178	1.77e-12	3.64e-10	17.9644
ERVK3-2	0.616176	11.3273	7.57747	2.69e-12	5.15e-10	17.5564
ST8SIA6	0.709838	6.07008	7.57018	2.81e-12	5.23e-10	17.5165
OLFML3	-0.577481	8.55846	-7.51791	3.77e-12	6.81e-10	17.2307
PLOD2	0.547424	9.82048	7.42769	6.27e-12	1.05e-09	16.7396
MID1	0.529616	8.93305	7.40122	7.27e-12	1.19e-09	16.5961
NRIP1	0.625801	10.7176	7.38213	8.09e-12	1.31e-09	16.4927
CADM3	-0.501545	8.13876	-7.33129	1.08e-11	1.65e-09	16.2181
ABCG2	-0.518904	10.3754	-7.31203	1.2e-11	1.79e-09	16.1143
EGLN3	0.761565	8.82847	7.31187	1.2e-11	1.79e-09	16.1134
GUCA2A	0.596338	8.94252	7.29008	1.35e-11	1.99e-09	15.9961
HTRA1	0.522145	12.1858	7.15912	2.8e-11	3.79e-09	15.2948
CATSPERB	-0.591672	7.3292	-7.08907	4.11e-11	5.44e-09	14.9224
LEPREL1	-0.553999	8.33074	-7.06476	4.7e-11	6.16e-09	14.7935
HCAR3	0.513909	6.46899	6.98307	7.35e-11	9.15e-09	14.3623
ANKRD37	0.554852	8.11988	6.92892	9.87e-11	1.17e-08	14.0779
SPX	-0.949623	6.82203	-6.87853	1.3e-10	1.49e-08	13.8142
UCA1	1.0345	10.676	6.73827	2.76e-10	2.82e-08	13.0859
HCAR2	0.540391	7.07905	6.62601	5.02e-10	4.83e-08	12.5089
CLDN16	-0.676325	8.19534	-6.53358	8.19e-10	7.19e-08	12.0379
TREM1	1.00165	9.3587	6.5183	8.88e-10	7.77e-08	11.9604
GSTA3	-0.514338	9.23195	-6.51622	8.97e-10	7.82e-08	11.9499
OPRK1	-0.731262	8.0021	-6.39828	1.66e-09	1.33e-07	11.3553
CRH	0.862013	11.01	6.38773	1.76e-09	1.39e-07	11.3024
VNN3	-0.669604	6.76174	-6.20811	4.45e-09	3.11e-07	10.4101
SPON1	-0.50679	8.28793	-6.17534	5.26e-09	3.54e-07	10.2489
RNU6-316P	-0.635375	8.29149	-6.17153	5.36e-09	3.59e-07	10.2302
HPGDS	-0.525048	8.97412	-6.08312	8.4e-09	5.36e-07	9.79819
STBD1	0.634784	7.75286	6.04457	1.02e-08	6.24e-07	9.61101
C14orf37	0.535939	7.62176	6.03459	1.07e-08	6.54e-07	9.56264
DNAH11	0.503446	7.18638	5.82317	3.08e-08	1.59e-06	8.5505
SLCO4A1	0.679132	8.52903	5.74993	4.42e-08	2.19e-06	8.20521
FRZB	-0.558123	10.9685	-5.49892	1.49e-07	6.1e-06	7.04385
CLDN1	-0.654249	10.7582	-5.46688	1.73e-07	6.91e-06	6.89812
PLAC8	0.636381	9.43833	5.43838	1.98e-07	7.72e-06	6.76894
IL1R2	0.580352	8.30385	5.40986	2.27e-07	8.63e-06	6.64018
UPK1B	0.698252	8.6725	5.39862	2.39e-07	9.04e-06	6.58956
S100A12	-0.626326	7.07897	-5.04466	1.22e-06	3.53e-05	5.03297
RNU6-732P	-0.511966	6.67135	-4.97761	1.65e-06	4.53e-05	4.7466
GABRB1	-0.565832	6.42596	-4.79001	3.78e-06	9.18e-05	3.96028
CP	0.805002	6.89249	4.76206	4.27e-06	0.000102084	3.84501
DEFA1B	-0.693834	7.62779	-4.69202	5.78e-06	0.000129979	3.55847
FABP4	0.544159	10.2436	4.64825	6.97e-06	0.0001518	3.38103
HAPLN1	-0.522395	9.41741	-4.45589	1.57e-05	0.000295542	2.61622
MUC1	0.540044	8.22439	3.87112	0.000157613	0.00197156	0.449025
CPS1	-0.521849	7.89241	-3.71861	0.000276898	0.0030651	-0.075204
FLJ38894	0.665545	8.68161	3.30913	0.00115672	0.00933616	-1.39407
PRL	0.50963	7.34146	2.87803	0.00454984	0.025485	-2.63688
IGFBP1	0.52716	10.3054	2.85068	0.00493893	0.0271214	-2.7105
