# Supplementary material for: Placenta autophagy is closely associated with preeclampsia
Source: publisher site journal article supplement (doi:10.18632/aging.204436), 2022-12-19
Supplement: Supplementary file [file aging-v15i24-204436-supplementary-material-SD2.pdf]

## SUPPLEMENTARY TABLES

**Supplementary Table 1. GO functional enrichment analysis of the PE-related differential autophagy genes.**

| ONTOLOGY | ID         | Description                                                                                   | pvalue   | p.adjust | qvalue   |
|----------|------------|-----------------------------------------------------------------------------------------------|----------|----------|----------|
| BP       | GO:0016052 | carbohydrate catabolic process                                                                | 0.001096 | 0.036522 | 0.011503 |
| BP       | GO:0044262 | cellular carbohydrate metabolic process                                                       | 0.002206 | 0.036522 | 0.011503 |
| BP       | GO:1904925 | positive regulation of autophagy of mitochondrion in response to mitochondrial depolarization | 0.003477 | 0.036522 | 0.011503 |
| BP       | GO:0001666 | response to hypoxia                                                                           | 0.003548 | 0.036522 | 0.011503 |
| BP       | GO:0030198 | extracellular matrix organization                                                             | 0.003725 | 0.036522 | 0.011503 |
| BP       | GO:1904923 | regulation of autophagy of mitochondrion in response to mitochondrial depolarization          | 0.003744 | 0.036522 | 0.011503 |
| CC       | GO:0034045 | phagophore assembly site membrane                                                             | 0.004051 | 0.037995 | 0.007499 |
| CC       | GO:0030867 | rough endoplasmic reticulum membrane                                                          | 0.006577 | 0.037995 | 0.007499 |
| CC       | GO:0000407 | phagophore assembly site                                                                      | 0.008089 | 0.037995 | 0.007499 |
| CC       | GO:0030315 | T-tubule                                                                                      | 0.013119 | 0.037995 | 0.007499 |
| CC       | GO:0101003 | ficolin-1-rich granule membrane                                                               | 0.015375 | 0.037995 | 0.007499 |
| CC       | GO:0016529 | sarcoplasmic reticulum                                                                        | 0.017877 | 0.037995 | 0.007499 |
| MF       | GO:0030246 | carbohydrate binding                                                                          | 3.47E-05 | 0.00066  | 7.31E-05 |
| MF       | GO:0048029 | monosaccharide binding                                                                        | 0.000176 | 0.00167  | 0.000185 |
| MF       | GO:0031406 | carboxylic acid binding                                                                       | 0.001158 | 0.0062   | 0.000687 |
| MF       | GO:0043177 | organic acid binding                                                                          | 0.001305 | 0.0062   | 0.000687 |
| MF       | GO:0005536 | glucose binding                                                                               | 0.003105 | 0.011797 | 0.001307 |
| MF       | GO:0031418 | L-ascorbic acid binding                                                                       | 0.005639 | 0.013092 | 0.001451 |

**Supplementary Table 2. Functional enrichment analysis of the DEGs between the two clusters.**

| Ontology | ID         | Description                         | pvalue   | p.adjust | qvalue |
|----------|------------|-------------------------------------|----------|----------|--------|
| BP       | GO:0001666 | response to hypoxia                 | 1.58e-05 | 0.008    | 0.006  |
| BP       | GO:0036293 | response to decreased oxygen levels | 1.88e-05 | 0.008    | 0.006  |
| BP       | GO:0070482 | response to oxygen levels           | 2.68e-05 | 0.008    | 0.006  |
| CC       | GO:0005925 | focal adhesion                      | 0.003    | 0.051    | 0.051  |
| CC       | GO:0005924 | cell-substrate adherens junction    | 0.003    | 0.051    | 0.051  |
| CC       | GO:0030055 | cell-substrate junction             | 0.003    | 0.051    | 0.051  |
| MF       | GO:0036122 | BMP binding                         | 1.32e-04 | 0.007    | 0.005  |
| MF       | GO:0048185 | activin binding                     | 2.17e-04 | 0.007    | 0.005  |
| MF       | GO:0048029 | monosaccharide binding              | 2.22e-04 | 0.007    | 0.005  |
| KEGG     | hsa04066   | HIF-1 signaling pathway             | 2.68e-04 | 0.009    | 0.007  |
